# Supplementary material for: Diclofenac Sodium for Fever Control in Neurocritical Care: A Systematic Review
Source: MDPI journal article supplement (doi:10.3390/jcm12103443), 2023-05-13
Supplement: s1 [file s1]

## Appendix S1

Detailed search strategies.

Search strategies for the article appendix:

### **Medline:**

("diclofenac sodium"[Mesh] OR "diclofenac"[Mesh] OR "diclofenac sodium"[tiab] OR "voltaren"[tiab] OR "Anti-Inflammatory Agents"[Mesh] OR "anti-inflammatory agents [tiab]) AND ("Fever"[Mesh] OR "temperature"[Mesh] OR "fever"[tiab]) AND ("critical care"[Mesh] OR "intensive care unit"[Mesh] OR "intensive"[tiab] OR "neurocritical care"[tiab] OR "ICU"[tiab]) NOT (exp CHILD/ not exp ADULT/, exp Animals/ not Humans/, case reports)

### **Cochrane library ® search in the search engine with Keyword or Title abstract keyword :**

(diclofenac sodium\* or diclofenac\* or voltaren\* or sodium).ab,hw,ti. AND (acute or intensive care or intensive or ((critical or neurocritical) adj2 care)).ab,hw,ti. AND (fever or temperature).ab,hw,ti.

### **Scopus via Elsevier:**

(( TITLE-ABS-KEY ( diclofenac\* OR sodium OR diclofenac sodium \* OR Anti-Inflammatory Agents \*) AND TITLE-ABS-KEY (fever\* OR temperature\* OR body temperature) AND TITLE-ABS-KEY( intensive care\* OR critical\* OR care\* OR icu\* OR neurocritical care) AND NOT (( TITLE ( case-report\* ))
