# Supplementary material for: Diclofenac Sodium for Fever Control in Neurocritical Care: A Systematic Review
Source: MDPI journal article supplement (doi:10.3390/jcm12103443), 2023-05-13
Supplement: s1 [file s1]

Figure . Study Flow

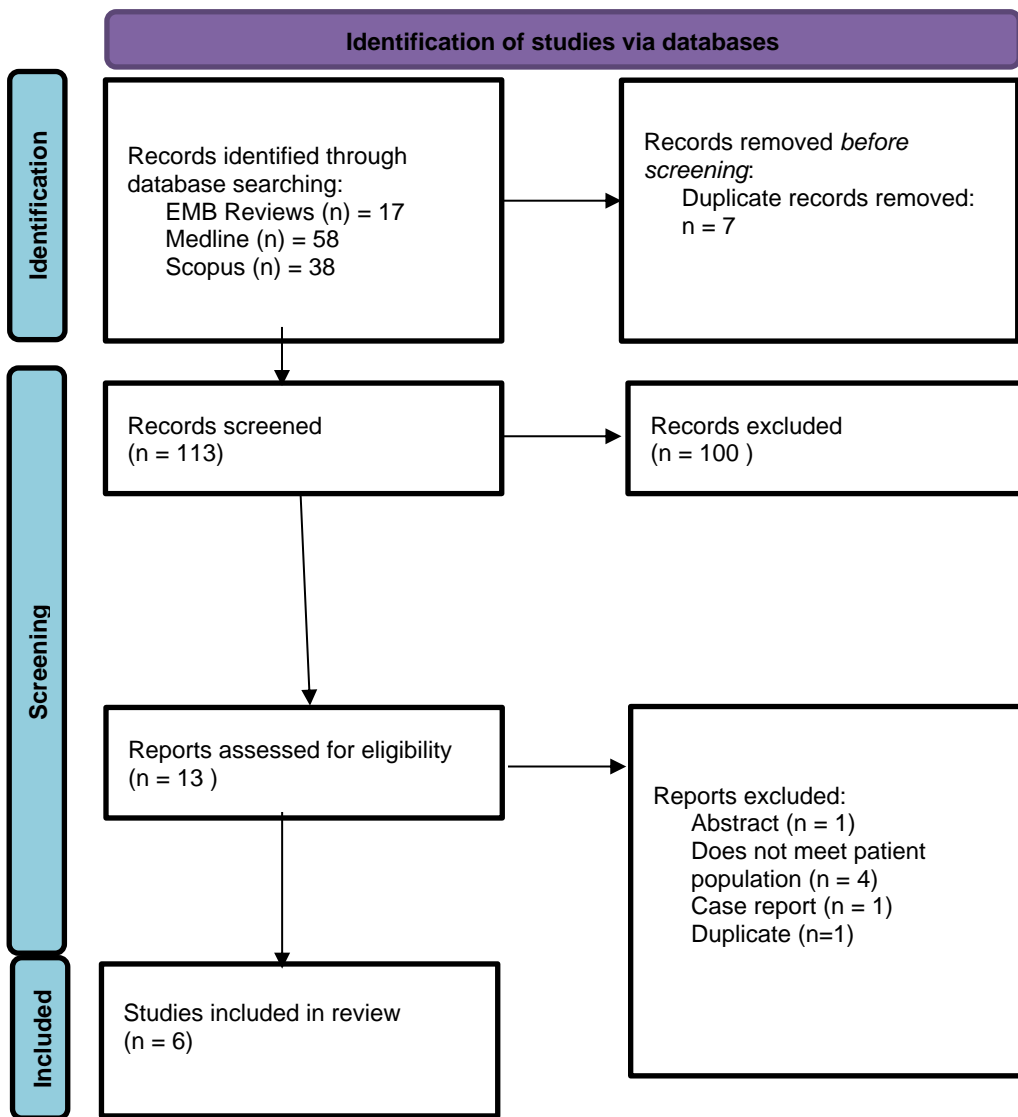

Preferred Reporting Items for Systematic Reviews and Meta-analyses Study Flow
