# Supplementary material for: Diclofenac Sodium for Fever Control in Neurocritical Care: A Systematic Review
Source: MDPI journal article supplement (doi:10.3390/jcm12103443), 2023-05-13
Supplement: s1 [file s1]

**Table S1 Effects of Diclofenac administration on body temperature and cerebral parameters**

| Study, year      | Day of study | GCS before (mean) | T° type of measure (°C)             | T° before   | T° after    | Time of administration | MAP                           | HR              | CPP (mmHg)      | CCP before  | CCP after        | ICP (mmHg)      | ICP before | ICP after  |
|------------------|--------------|-------------------|-------------------------------------|-------------|-------------|------------------------|-------------------------------|-----------------|-----------------|-------------|------------------|-----------------|------------|------------|
| Cormio 2000      | 4,5          | 7 ± 2             | Axillary                            | 38,5 ± 0,4  | 36,9 ± 0,5  | 48 hours               | Stable                        | Normalised      | Slight increase | 75,3 ± 11,8 | 89,1 ± 12,8      | Decreased       | 22,7 ± 6,6 | 12,1 ± 6,6 |
| Caricato 2004    | 0,16         | ≤ 7               | Bladder                             | 38,6 ± 0,1  | 36,8 ± 0,3  | 24h at least           | Slight decrease after 6 hours | Stable          | Stable          | No data     | No data          | Slight decrease | No data    | No data    |
| Cormio 2004      | 7            | 5                 | No data                             | 38,4 ± 0,4  | 37,6 ± 0,5  | Repeated doses         | Slight decrease               | Decrease        | Stable          | 71 ± 15     | 69 ± 15          | Decreased       | 16 ± 8     | 12,6 ± 6   |
| Cormio 2007      | 2,6          | ≤ 8               | Bladder                             | 38,3        | 37,3 ± 0,2  | 6,6 ± 2,2 days         | Increased                     | Not monitored   | Increased       | 71          | 79 ± 16          | Decreased       | 17         | 15,7 ± 6,6 |
| Schiefecker 2013 | No data      | No data           | Bladder                             | 38,3 ± 0,05 | 37,5 ± 0,05 | No data                | Decreased                     | Not monitored   | Slight decrease | 85 ± 1,4    | 76 (no interval) | No change       | 8,6 ± 0,4  | No change  |
| Picetti 2016     | No data      | ≤ 8               | Bladder / pulmonary artery catheter | 37,8 ± 0,3  | 37,5 ± 0,5  | 2 hours                | Slight decrease               | Slight decrease | Slight decrease | 86,8 ± 14   | 74,1 ± 11        | No change       | 15,5 ± 5,1 | 15,4 ± 4,6 |

Legends : T° = Body temperature; MAP = mean arterial pressure; HR = heart rate; CPP = cerebral pulsed pressure, ICP = intracranial pressure
